# Supplementary material for: Network Pharmacology-Based Study to Uncover Potential Pharmacological Mechanisms of Korean Thistle (Cirsium japonicum var. maackii (Maxim.) Matsum.) Flower against Cancer
Source: MDPI journal article supplement (doi:10.3390/molecules26195904), 2021-09-29
Supplement: s1 [file s1]

| The number of 309 targets<br>from SEA; | The number of 396 targets<br>from STP; | The number of 108 overlapping<br>targets between SEA and STP |
|----------------------------------------|----------------------------------------|--------------------------------------------------------------|
| AKR1B1                                 | AKR1B1                                 | AKR1B1                                                       |
| TPO                                    | GBA                                    | MTNR1B                                                       |
| HMBS                                   | CYP2A6                                 | MTNR1A                                                       |
| UNG                                    | SIRT3                                  | PTPRC                                                        |
| TYMP                                   | SIRT2                                  | CES2                                                         |
| GPR84                                  | IDO1                                   | ADORA3                                                       |
| ENGASE                                 | TYR                                    | ADORA1                                                       |
| MTNR1B                                 | DAO                                    | ADORA2A                                                      |
| MTNR1A                                 | FUCA1                                  | ADK                                                          |
| VCAM1                                  | PRKCA                                  | ADORA2B                                                      |
| DDX3X                                  | PRKCD                                  | IMPDH2                                                       |
| PHLPP2                                 | TRPV4                                  | ADH1A                                                        |
| NFE2L2                                 | ABCB1                                  | POLA1                                                        |
| SMARCA2                                | HMGCR                                  | POLB                                                         |
| PTPRC                                  | PRKCG                                  | PAM                                                          |
| MBD2                                   | PRKCE                                  | FAAH                                                         |
| CASP4                                  | PRKCH                                  | EPHX1                                                        |
| CES2                                   | PRKCQ                                  | CES1                                                         |
| PNMT                                   | PTAFR                                  | ADH1C                                                        |
| KCNMA1                                 | OPRM1                                  | NAAA                                                         |
| CASP9                                  | OPRK1                                  | FABP3                                                        |
| SLC29A1                                | PSEN2                                  | PRKCA                                                        |
| ADORA3                                 | PSENEN                                 | S1PR3                                                        |
| DNPH1                                  | NCSTN                                  | HAO1                                                         |
| ADORA1                                 | APH1A                                  | PPP1CC                                                       |
| SLC28A2                                | PSEN1                                  | PPM1B                                                        |
| DNMT3B                                 | APH1B                                  | SLC22A6                                                      |
| CDA                                    | PPP5C                                  | PPARA                                                        |
| ADORA2A                                | PPP1CA                                 | PHF8                                                         |
| AMD1                                   | PPM1B                                  | GSTK1                                                        |
| P2RY2                                  | PPP1CC                                 | PAOX                                                         |
| P2RY6                                  | HSD11B1                                | ACP1                                                         |
| AHCY                                   | SLC2A1                                 | HMGCR                                                        |
| SRM                                    | ADCY1                                  | KDM2A                                                        |
| DTYMK                                  | VDR                                    | RARB                                                         |
| GAPDH                                  | FOLH1                                  | CDC25B                                                       |
| ADK                                    | GLRA1                                  | PTGER2                                                       |
| QARS                                   | GLRA2                                  | EPHX2                                                        |
| HSPA8                                  | PPM1A                                  | TBXAS1                                                       |
| P2RY4                                  | PTGS2                                  | CDC25A                                                       |
| HSPA5                                  | PYGL                                   | HSD17B3                                                      |

|         |         |          |
|---------|---------|----------|
| TOP1    | PYGM    | PPARG    |
| SMS     | PYGB    | TBXA2R   |
| DOT1L   | CA1     | FOLH1    |
| P2RY14  | ACHE    | PTGER4   |
| RARS    | PDE10A  | PTGIR    |
| KMT5C   | CA9     | PLA2G4A  |
| SETDB1  | SLC6A3  | FFAR4    |
| P2RX1   | ADRA2A  | GABBR1   |
| TARS    | ADRA2C  | FABP4    |
| TK1     | ADRA2B  | PTGFR    |
| PRMT7   | SLC6A4  | PPARD    |
| ADORA2B | CYP11B1 | S1PR1    |
| IMPDH1  | GABRA2  | TRPV1    |
| FUT6    | CYP11B2 | CNR1     |
| RNASE1  | CA2     | KDM5C    |
| RNASE2  | C1R     | CPT2     |
| HARS    | KCNK2   | PPM1A    |
| RNASEL  | PLG     | PRKCE    |
| GPR17   | KLK1    | VEGFA    |
| HLCS    | ELANE   | TOP2A    |
| P2RY11  | C1S     | G6PD     |
| ADA     | ADRA1A  | CYP17A1  |
| IARS    | PSMB1   | SERPINA6 |
| PARG    | CTSH    | SHBG     |
| EZH1    | PIK3CD  | RORA     |
| SUV39H1 | ADORA1  | NPC1L1   |
| DNMT1   | CXCR2   | NR1H3    |
| RAC1    | ADORA2A | GABRB2   |
| IMPDH2  | GABRB3  | ESR2     |
| MARS    | MET     | AR       |
| P2RX4   | HRH3    | MGLL     |
| ATIC    | LIPE    | SQLE     |
| PRMT1   | HRH4    | FNTB     |
| PLCG1   | ALOX15  | FNTA     |
| UMPS    | GRM5    | ICMT     |
| KMT2A   | EGFR    | PHLPP1   |
| CDC42   | PDGFRA  | BCHE     |
| TK2     | P2RX7   | AKT1     |
| EHMT1   | PLA2G7  | GPBAR1   |
| TPMT    | FKBP1A  | SRD5A2   |
| CD69    | CES1    | ESR1     |
| P2RY1   | TRPM8   | SRD5A1   |
| SETD7   | PIM1    | SHH      |

|          |          |         |
|----------|----------|---------|
| HPRT1    | ADORA2B  | SREBF2  |
| ADH1A    | TAAR1    | CYP19A1 |
| PDCD4    | HSP90AB1 | NR1H4   |
| NPEPPS   | TNKS2    | UGT2B7  |
| POLA1    | CA12     | NR1H2   |
| PAX8     | PTPN1    | VDR     |
| PNP      | LRRK2    | GC      |
| INMT     | TSPO     | CDC45   |
| LGALS7   | GABRB2   | CD81    |
| LGALS7B  | GABRG2   | CYP24A1 |
| EHMT2    | PDGFRB   | PTPN2   |
| MAP3K7   | PIK3R1   | PTPN1   |
| HSPA1A   | GABRA5   | FGF1    |
| LGALS9   | METAP1   | AKR1B10 |
| POLB     | TLR4     | PTPN6   |
| MGAM     | NAAA     | HSD11B2 |
| NEU2     | KDR      | IL1B    |
| NEU4     | MGLL     | PTPRF   |
| PLA2G4B  | CES2     | HSD11B1 |
| PLA2G2C  | BCHE     | TAS2R31 |
| P2RY10   | NISCH    | ABCB1   |
| SLC25A20 | CTSS     | CA2     |
| LPAR3    | PTPRC    | CA1     |
| PAM      | CTSL     | RORC    |
| LPAR4    | MAPK8    |         |
| GPR34    | FABP4    |         |
| LPAR6    | PPARA    |         |
| GSTM1    | FABP3    |         |
| LPAR2    | FABP5    |         |
| GGPS1    | PPARD    |         |
| PLA2G5   | FABP2    |         |
| FAAH     | FFAR1    |         |
| NOD1     | SLC22A6  |         |
| EPHX1    | CDC25A   |         |
| FDPS     | AKR1B10  |         |
| CES1     | POLB     |         |
| PLA2G2D  | PHF8     |         |
| LPAR1    | UGT2B7   |         |
| ADH1C    | NR1H4    |         |
| S1PR2    | CYP19A1  |         |
| SPHK1    | SERPINA6 |         |
| CDC25C   | SHBG     |         |
| ADH1B    | HSD17B3  |         |

|          |          |
|----------|----------|
| NAAA     | G6PD     |
| LAP3     | GABBR1   |
| THRB     | PTGER2   |
| CA3      | KDM2A    |
| TLR2     | KDM5C    |
| PLA2G2A  | GPBAR1   |
| FABP3    | NPC1L1   |
| PRKCA    | FNTA     |
| THRA     | AR       |
| S1PR3    | HAO1     |
| HAO1     | PTGFR    |
| SLC22A8  | GSTK1    |
| PIN4     | LTA4H    |
| WRN      | HSD11B2  |
| PPP1CC   | NR0B2    |
| PPM1B    | CDC45    |
| PPID     | PPARG    |
| KAT2A    | RXRA     |
| CA14     | CYP26A1  |
| SLC22A6  | CYP26B1  |
| PPARA    | RARG     |
| BBOX1    | RARB     |
| OXER1    | RARA     |
| GNAI1    | FAAH     |
| GNAI3    | TERT     |
| CYP4F2   | FABP1    |
| GABRQ    | FFAR4    |
| KDM7A    | CACNA2D1 |
| DNM1     | RXRG     |
| COL4A3BP | ALOX12   |
| GNAO1    | PTGER4   |
| ACER2    | RXRB     |
| MPEG1    | SLC16A1  |
| ADH7     | ABCC1    |
| KDM5A    | EPHX2    |
| POLM     | CHRNA7   |
| PHF8     | PTGES    |
| GSTK1    | TBXA2R   |
| GPR174   | PLA2G4A  |
| PAOX     | SCD      |
| BHMT     | HTR2B    |
| SLCO2A1  | RORB     |
| SELL     | MAPK1    |

|         |          |
|---------|----------|
| SLC6A11 | RORA     |
| SMPD2   | SAE1     |
| LTB4R   | HNFB4A   |
| ACP1    | FNTB     |
| SELP    | UBA2     |
| ENPP2   | VEGFA    |
| HMGCR   | FGF1     |
| KDM2A   | FGF2     |
| PLA2G4C | HPSE     |
| KDM4A   | HSP90AA1 |
| RARB    | CDK1     |
| CDC25B  | LGALS4   |
| KDM4C   | LGALS3   |
| PTGER2  | LGALS8   |
| EPHX2   | DRD1     |
| GSR     | DRD2     |
| POLH    | ADRA1D   |
| TBXAS1  | HTR2A    |
| ENPEP   | HTR2C    |
| CDC25A  | DRD3     |
| POLL    | CYP2D6   |
| POLK    | HTR6     |
| S1PR4   | HTR1B    |
| PLA2G10 | RORC     |
| HSD17B3 | HEXA     |
| S1PR5   | HEXB     |
| PPARG   | OGA      |
| TBXA2R  | SLC6A2   |
| FOLH1   | STAT3    |
| DAGLA   | P4HTM    |
| PTGER4  | TRPV1    |
| PTGIR   | PAM      |
| PLA2G4A | CPT1A    |
| FFAR4   | KCNH2    |
| SLC22A1 | GRIN1    |
| GSTA1   | ACACB    |
| GABBR2  | MTNR1A   |
| GABBR1  | MTNR1B   |
| PTGER3  | GRIN2B   |
| FABP4   | PDE4A    |
| PTGFR   | PDE4B    |
| GPR35   | NR3C1    |
| ATG4B   | TOP2A    |

|          |         |
|----------|---------|
| KDM4E    | CYP17A1 |
| GABRR1   | C5AR1   |
| PPARD    | SIGMAR1 |
| S1PR1    | PGR     |
| TRPV1    | SRD5A2  |
| CNR1     | ESR2    |
| KDM5C    | GC      |
| CPT2     | S1PR1   |
| NAALAD2  | F2R     |
| EGLN3    | KCNA5   |
| PPM1A    | PIM3    |
| PGA5     | HDAC6   |
| PRKCE    | NR1H3   |
| VEGFA    | TNF     |
| FUT7     | EPHX1   |
| IL6ST    | CA4     |
| PLCG2    | NR1I3   |
| LPAR5    | CNR2    |
| APEX1    | S1PR3   |
| TOP2A    | ICMT    |
| GABBR2   | CCR1    |
| KDM4E    | HTR1A   |
| G6PD     | FASN    |
| CYP17A1  | CNR1    |
| SERPINA6 | CTSK    |
| SHBG     | CTSB    |
| GABRD    | TACR1   |
| RORA     | SLC6A7  |
| NPC1L1   | P2RX3   |
| NR1H3    | CCR8    |
| GABRB2   | KCNJ11  |
| SLC22A3  | KIF11   |
| ESR2     | PGGT1B  |
| AR       | CCKBR   |
| ASAH1    | PANK3   |
| MGLL     | CDK2    |
| SQLE     | SCARB1  |
| LSS      | IMPDH2  |
| FNTB     | DRD4    |
| FNTA     | CHRM3   |
| ICMT     | CAPN1   |
| FDFT1    | NPY5R   |
| BCL9     | PAOX    |

|         |         |
|---------|---------|
| TTPA    | OXTR    |
| PHLPP1  | MAPK10  |
| BCHE    | AVPR2   |
| AKT1    | HTR7    |
| GPBAR1  | HDAC4   |
| SRD5A2  | HCRTR2  |
| ST3GAL1 | HCRTR1  |
| ESR1    | ABL1    |
| SRD5A1  | MAPK14  |
| SHH     | CPT2    |
| SREBF2  | SCN9A   |
| EBP     | CACNA1H |
| CYP19A1 | AVPR1A  |
| ABCB11  | CHRM1   |
| ABCC4   | PTGER1  |
| NR1H4   | KCNJ5   |
| EPHA7   | KCNJ6   |
| SLC10A1 | TAOK1   |
| EPHA5   | TAOK3   |
| EPHA2   | F10     |
| EPHA4   | LIMK2   |
| EPHA8   | ECE1    |
| EPHB3   | DDAH1   |
| UGT2B7  | APLNR   |
| NR1H2   | PDE5A   |
| VDR     | SLC6A9  |
| GC      | SOAT1   |
| CDC45   | NR1H2   |
| CD81    | MME     |
| CD4     | KCNJ3   |
| CYP24A1 | HCAR2   |
| PTPN2   | F2      |
| PTPN1   | PRSS1   |
| CYP27B1 | CTRC    |
| FGF1    | SQLE    |
| AKR1B10 | BACE1   |
| PTPN6   | HSD17B1 |
| HSD11B2 | POLA1   |
| IL1B    | STS     |
| F3      | CASR    |
| PTPRF   | GSK3B   |
| HSD11B1 | NQO2    |
| TAS2R31 | CYP27A1 |

|         |         |
|---------|---------|
| ABCB1   | ADAMTS5 |
| SLC10A2 | CDK9    |
| CA2     | BRD4    |
| CA1     | BRD3    |
| GBA2    | RHOA    |
| RORC    | PRKCB   |
| UGCG    | NTRK1   |
| EPHB1   | RET     |
| EPHA1   | NR3C2   |
| EPHA6   | MPO     |
|         | HTR5A   |
|         | MAPK9   |
|         | CCND1   |
|         | KCNK3   |
|         | KCNK9   |
|         | CYP24A1 |
|         | TBXAS1  |
|         | MMP1    |
|         | MMP2    |
|         | CDK4    |
|         | GABRA3  |
|         | GABRA1  |
|         | AKT1    |
|         | PHLPP1  |
|         | ILK     |
|         | ESR1    |
|         | PTGS1   |
|         | ALOX5   |
|         | CCKAR   |
|         | ADK     |
|         | AURKB   |
|         | AURKA   |
|         | JAK3    |
|         | JAK1    |
|         | MCHR1   |
|         | PDK1    |
|         | BACE2   |
|         | CTSD    |
|         | CYP51A1 |
|         | SREBF2  |
|         | CYP2C19 |
|         | CHRM2   |
|         | DHCR7   |



PTPN6  
CDC25B  
NOS2  
PREP  
PTPN2  
ATP12A  
ADORA3  
MAPK3  
PTPN11  
PTPRF  
PLA2G1B  
ACP1  
SRD5A1  
NR1I2  
TRPA1  
CCR5  
ADH1A  
TYMS  
ADH1C  
GLI2  
GLI1  
PDE4D  
CD81  
PARP1  
PTGIR  
HSD17B2  
HRH1  
CCR2  
AKR1C2  
AKR1C1  
OPRD1  
FLT3  
HSD17B7  
NAMPT  
SCN5A  
TEK  
IL1B  
JAK2  
ROCK2  
CHEK1  
PTGDR2  
MTTP  
APOB

CXCR3  
ABCG2  
FPR2  
GAA  
MDM4  
MAP3K11  
MAP3K9  
MDM2  
TAS2R31  
TNKS  
SHH
